# Supplementary material
Source: PubMed Central journal article supplement (PMC3655887)
Supplement: NIHMS454812-supplement-01.pdf [file NIHMS454812-supplement-01.pdf]

## Supplemental Text, Kadoch & Crabtree

### Legends to Supplemental Figures:

**Figure S1. Related to Figure 1. (A)** Immunoprecipitation using anti-BAF250a, anti-BAF155, or anti-BAF47 antibodies reveals SS18. **(B)** Human SS18 exists as two alternatively spliced isoforms, yielding a double banding pattern upon immunoblot analysis. **(C)** Silver stain analysis of anti-Brg and anti-SS18 immunoprecipitations reveals similar banding patterns.

**Figure S2. Related to Figure 2. (A)** BAF47 total protein levels are significantly diminished in synovial sarcoma cells; BAF47 mRNA is comparable across various cell types assayed. **(B)** Wild-type SS18 protein levels are reduced in synovial sarcoma lines bearing the SS18-SSX fusion; SS18 wild type mRNA levels are also reduced. **(C)** Brg is localized to the SS18 promoter and an intronic region of the SS18 gene (Ho et al., 2011). **(D)** Glycerol gradient sedimentation analyses of both Aska-SS and Yamato-SS synovial sarcoma cell types. SS18 immunoblot on Aska cells (A) and Yamato cells (Y). L, ladder. **(E)** Quantitative densitometry of overexposed anti-SS18 immunoblot of Aska-SS monomeric (fx 3-6) and Brg-containing glycerol gradient fractions (fx 14-17). Error bars indicate s.d.

**Figure S3. Related to Figure 3. BAF47 mRNA levels are comparable in cells transfected with SS18 and SS18-SSX variants.** BAF47 mRNA levels at time t=72 hours post transfection with either empty vector control, SS18 FL (wild-type), SS18 1-379 (minus last 8aa of SS18 C-terminus), or SS18-SSX1. Error bars indicate s.d.

**Figure S4. Related to Figure 4. (A)** Reciprocal protein downregulation of SS18 and BAF47 upon shRNA-mediated KD. **(B)** ChIP-seq tracks of histone marks over the Sox2 locus in MEFs (Mikkelsen et al., 2007). **(C)** Anti-V5 ChIP analyses of V5-tagged SS18, SS18-SSX1, and SSX (78aa tail) at three sites of the human Sox2 locus. Error bars indicate s.d.

**Figure S5. Related to Figure 5. SS18-SSX1,2,4 but not SS18-SSX3,5 eject BAF47 from BAF complexes and induce Sox2mRNA expression. (A)** Anti-GFP IP studies performed in 293T cells transfected with SS18 FL, SS18 1-379, and SS18-SSX1-5 variants. **(B)** Sox2 mRNA levels in human fibroblasts infected with SS18 and SS18-SSX1-5 variants.

**Figure S6. Related to Figure 6.** Urea denaturation analysis on Yamato-SS synovial sarcoma cells. Urea series, 0M<[urea]<8M.

### References:

Ho, L., Miller, E.L., Ronan, J.L., Ho, W.Q., Jothi, R., and Crabtree, G.R. (2011). esBAF facilitates pluripotency by conditioning the genome for LIF/STAT3 signalling and by regulating polycomb function. *Nat Cell Biol* 13, 903-913.

Mikkelsen, T.S., Ku, M., Jaffe, D.B., Issac, B., Lieberman, E., Giannoukos, G., Alvarez, P., Brockman, W., Kim, T.K., Koche, R.P., et al. (2007). Genome-wide maps of chromatin state in pluripotent and lineage-committed cells. *Nature* 448, 553-560.

## Legends to Supplemental Tables:

**Table S1. Antibody Specifications. *Related to Experimental Procedures.***

**Table S2. Primer Specifications. *Related to Experimental Procedures.***

**Table S3. shRNA Specifications. *Related to Experimental Procedures.***

## Extended Experimental Procedures:

**Affinity purification and mass spectrometry.** A rabbit polyclonal antibody raised against aa1257–1338 of hBrg (SMARCA4) that recognizes both mouse Brg and Brm (SMARCA2) was used for affinity purification from nuclear extracts obtained from ES cells; a monoclonal antibody to Brg (SCBT G7) was used in purifications from p1.5 whole brains. Immunoprecipitation of endogenous complexes was performed in 300 mM NaCl, 50mMTris-HCl (pH 8.0), 1% Nonidet P-40, 0.5% deoxycholate, 0.1% SDS, 1 mM DTT. Purified complexes were separated further by strong cationic exchange, and fractions were analyzed on LTQ-Orbitrap (Thermo Scientific). Peptides were identified by searching acquired mass spectra using SEQUEST (University of Washington) against the Mouse IPI database version 3.34. Peptide identifications were validated statistically using PeptideProphet, and the protein inference was performed using ProteinProphet, available as a part of the TransProteomic Pipeline (2). The list of protein identifications in each analysis was filtered using a 0.95 probability threshold or as otherwise stated (estimated error rate of less than 1%). All proteins identified in the control runs and other known contaminants were subtracted from the final list.

**Preparation of ES Nuclear Extracts and IP.** All cell types were grown under standard conditions and lysed and homogenized in Buffer A( 10 mM Hepes (pH 7.6), 25 mM KCl, 1 mM EDTA, 10% glycerol, 1 mM DTT, and protease inhibitors (complete mini tablets (Roche) supplemented with 1 mM PMSF) on ice. Nuclei were sedimented by centrifugation (1,000xg), resuspended in Buffer C (10 mM Hepes (pH 7.6), 3 mM MgCl<sub>2</sub>, 100 mM KCl, 0.1 mM EDTA, 10% glycerol, 1 mM DTT, and protease inhibitors), and lysed by the addition of ammonium sulfate to a final concentration of 0.3 M. Soluble nuclear proteins were separated by the insoluble chromatin fraction by ultracentrifugation (100,000xg) and precipitated with 0.3 mg/ml ammonium sulfate for 20 min on ice. Protein precipitate was isolated by ultracentrifugation (100,000xg), and resuspended in IP buffer (150 mM NaCl, 50 mM Tris-HCl (pH 8.0), 1% NonidetP-40, 0.5% deoxycholate, 1 mM DTT, 1mM PMSF with protease inhibitors) for immunoprecipitation analyses or HEMG-0 buffer (25mM HEPES pH 7.9, 0.1mM EDTA,

12.5 mM MgCl<sub>2</sub>, 100mM KCl, freshly supplemented with DTT and PMSF) for glycerol gradient analyses.

**Immunoprecipitation.** Nuclear extracts were resuspended in IP buffer and precleared for 30 minutes at 4 degrees C using Protein G/A Sepharose beads (GE Healthcare). The protein concentration was determined using Bradford assay and adjusted to a final volume of 250 µL at a final concentration of 1.5 mg/mL with IP buffer. Each IP was incubated with 2.5 µg of antibody (Antibody specifications are presented in [Table S1](#)) overnight at 4°C and then for 2h with 20 µL Protein A/G Sepharose beads. The beads were washed four times at room temperature with 1 mL IP buffer and resuspended in 20 µL 2x gel loading buffer (4x LDS Buffer; Invitrogen)+ DTT.

**Density sedimentation analyses.** HEMG buffer: 25mM HEPES pH 7.9, 0.1mM EDTA, 12.5 mM MgCl<sub>2</sub>, 100mM KCl, freshly supplemented with DTT and PMSF before use.

**shRNA-mediated knock down and lentiviral (LV) generation.** LV was produced by PEI (Polysciences Inc., 24765) transfection of 293t lentiX cells (Clontech) with gene delivery vector co-transfected with packaging vectors pspax2 and pMD2.G essentially as described by ([Tiscornia et al., 2006](#)). Cell supernatants were collected at 72 hours post transfection and centrifuged at 20,000 rpm for 2 hours at 4° C. Virus-containing pellets were resuspended in PBS and used to infect cells by spinfection methods (1000xg, 30 min at 37°C). Selection of LV-infected cells was achieved with puromycin used at 2 µg/ml. KD efficiency was determined and confirmed by RT-PCR and western blot analysis. The SS18-SSX1 specific shRNA was designed, synthesized, and cloned into pLKO.1. Infected cells were selected with Puromycin (2µg/ml).

**Chromatin Immunoprecipitation (ChIP) Analysis.** Briefly, for each 10 cm plate sample: cells were trypsinized for 5–8 min, trypsin was quenched by addition of 10 ml media containing FBS, cells were diluted to 40 ml with PBS and fixed for 12 min by addition of formaldehyde to a final concentration of 1%. Crosslinking was then quenched by addition of 2.5 M glycine (0.125 M final concentration) and cells were incubated on ice. Crosslinked cells were spun at 600x g for 5 min, nuclei were prepared by consecutive washes with Paro Rinse 1 buffer (10 mM Tris pH 8.0, 10 mM EDTA [pH 8.0], 0.5 mM EGTA, 0.25% Triton X-100) followed by Paro 2 buffer (10 mM Tris pH 8.0, 1 mM EDTA, 0.5 mM EGTA, 200 mM NaCl). Pellets were resuspended in 2 ml total volume of ChIP lysis buffer (50 mM HEPES/KOH pH 7.5, 300 mM NaCl, 1 mM EDTA, 1% Triton X-100, 0.1% DOC, 0.1% SDS, plus protease inhibitors complete mini (Roche)) and then sonicated for 9 x 30 s (ES cells) or 23 x 30s at an amplitude of 30 with a Misonix sonicator, or until DNA was sheared to between 500 and 1000 bp (as confirmed by agarose gel). Antibodies used for ChIP are as follows: anti-BAF155 (in house generated), anti-H3K27me3 (Millipore, 07-449), V5 (Invitrogen, 46-0705). Primers used for real-time PCR listed in [Table S2](#).

**Figure S1.**

**1A.**

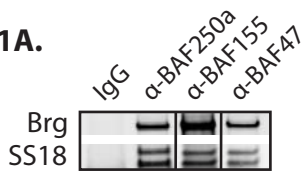

**1B.**

```

huSS18var1      MSVAFAPRQRGKGEITPAAIQKMLDDNNHLIQCIMDSQNKGKTSECSQYQQLHTNLVY 60
huSS18var2      MSVAFAPRQRGKGEITPAAIQKMLDDNNHLIQCIMDSQNKGKTSECSQYQQLHTNLVY 60
*****

huSS18var1      LATIADSNQNMQSLLPAPPTQNMPMGPGGMNQS GPPPPRSHNMPSDGMVGGGPPAPHMQ 120
huSS18var2      LATIADSNQNMQSLLPAPPTQNMPMGPGGMNQS GPPPPRSHNMPSDGMVGGGPPAPHMQ 120
*****

huSS18var1      NQMNGQMPGPNHMPMQGPGPNQLNMTNSSMNPSSSHGSMGGYNH SVSPSSQSMFVQNQMT 180
huSS18var2      NQMNGQMPGPNHMPMQGPGPNQLNMTNSSMNPSSSHGSMGGYNH SVSPSSQSMFVQNQMT 180
*****

huSS18var1      MSQGQPMGNYGFRPNMSMQPNQGPMMHQPPSQYINMPQGGGQHYQGQQPPMGMGQVNO 240
huSS18var2      MSQGQPMGNYGFRPNMSMQPNQGPMMHQPPSQYINMPQGGGQHYQGQQPPMGMGQVNO 240
*****

huSS18var1      GNHMMGQRQIPFYRPPQGGPPQYSGQEDYYGDQYSHGGQGPPEGMNQYYYPDGHNDYGY 300
huSS18var2      GNHMMGQRQIPFYRPPQGGPPQYSGQEDYYGDQYSHGGQGPPEGMNQYYYPD----- 293
*****

huSS18var1      QQPSYPEQGYDRPYEDSSQHYYEGGNSQYGGQQDAYQGPPQGGYPPQQQYYPGQQGYPG 360
huSS18var2      -----GNSQYGGQQDAYQGPPQGGYPPQQQYYPGQQGYPG 329
*****

huSS18var1      QQQGYGSPQGGPGPYPNYPQGGQQYGGYRPTQPGPPQPPQRPYGYDQGQYGNYYQ 418
huSS18var2      QQQGYGSPQGGPGPYPNYPQGGQQYGGYRPTQPGPPQPPQRPYGYDQGQYGNYYQ 387
*****
    
```

**1C.**

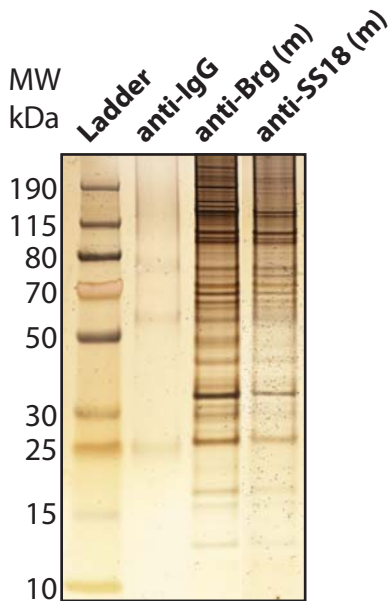

Figure S2.

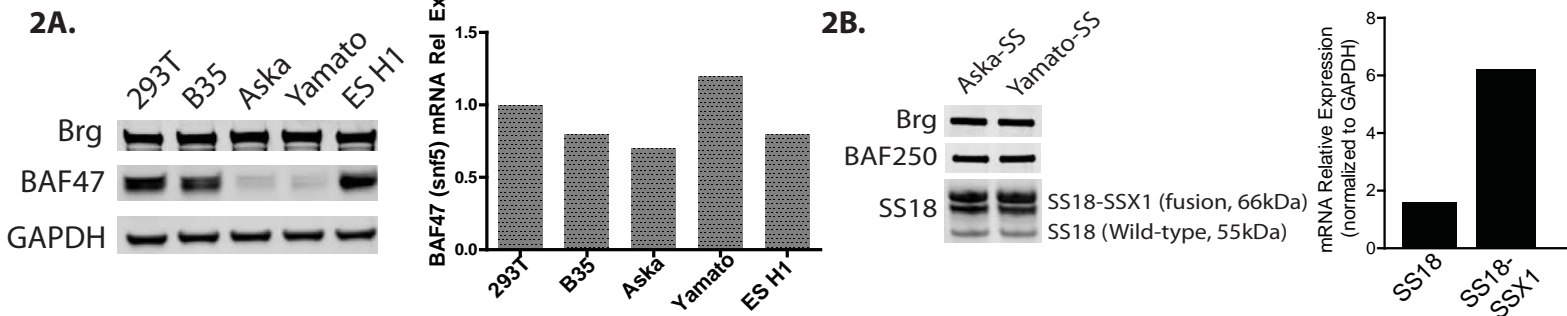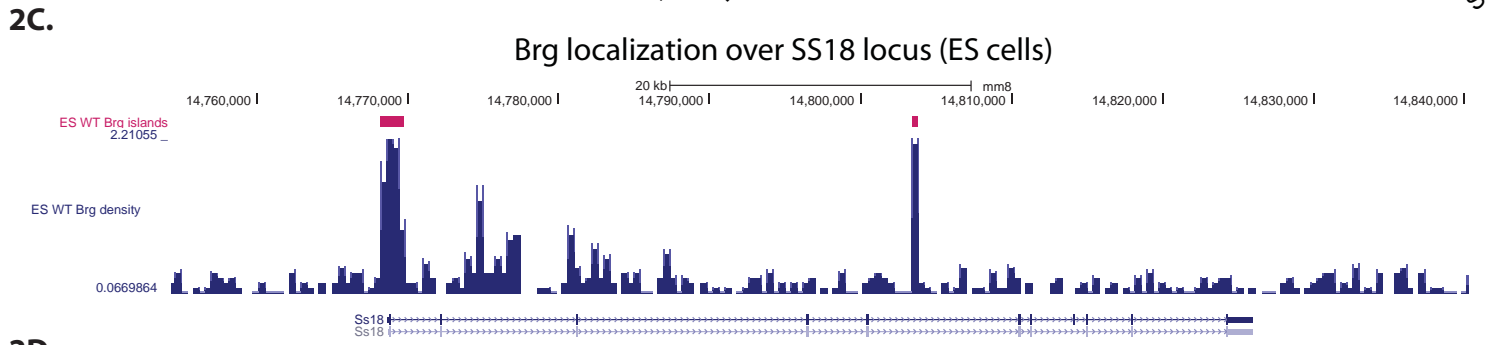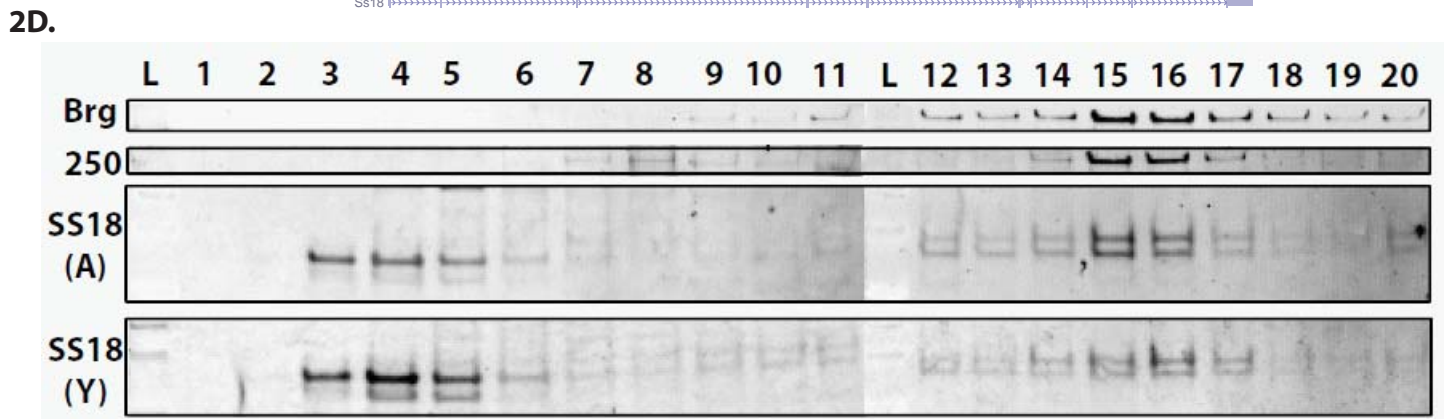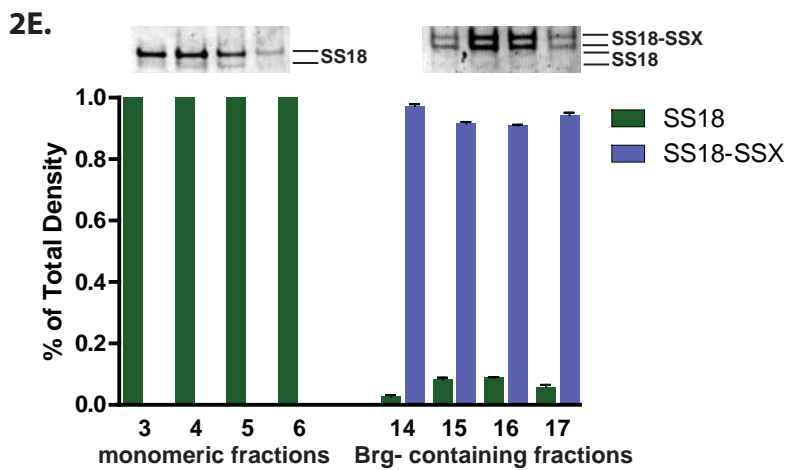

Figure S3.

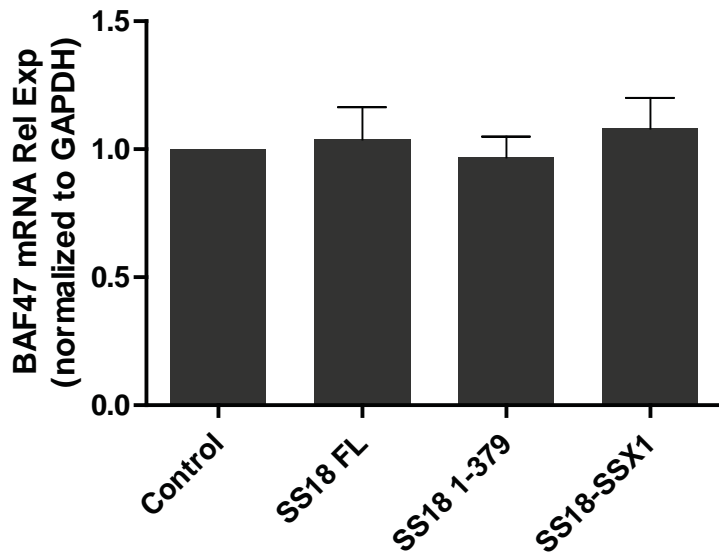

**Figure S4.**

A.

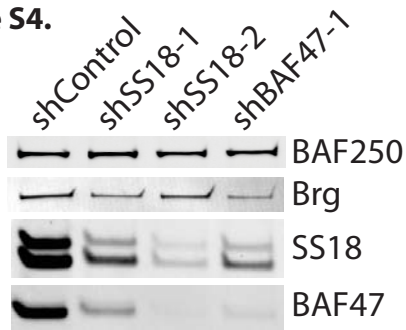

B.

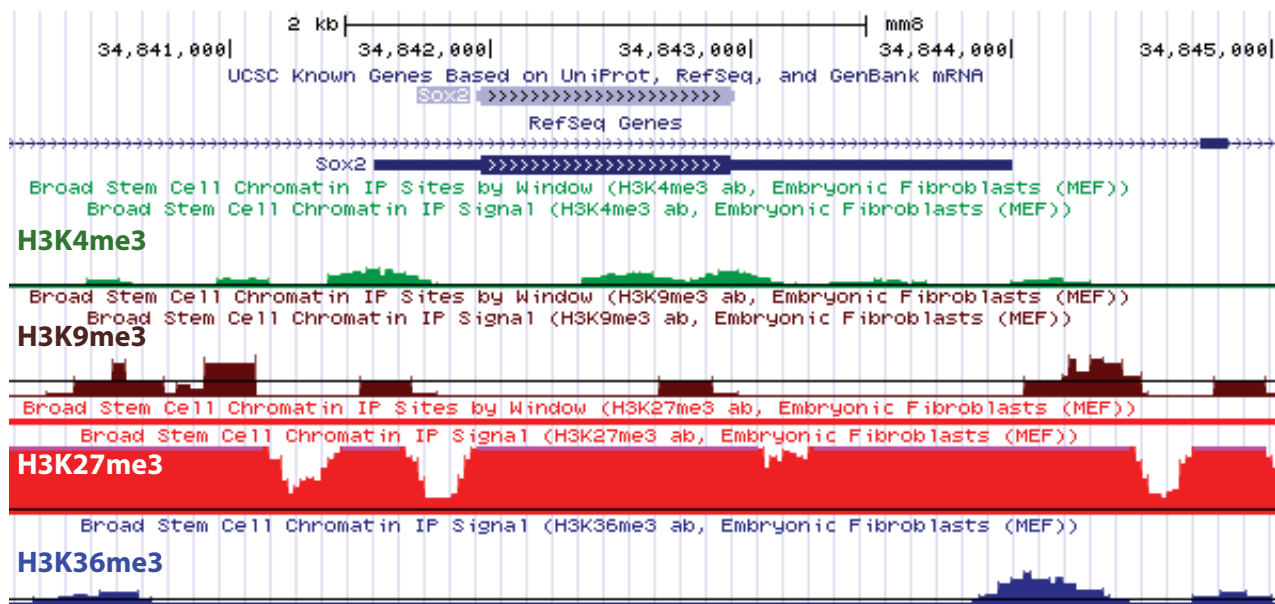

C.

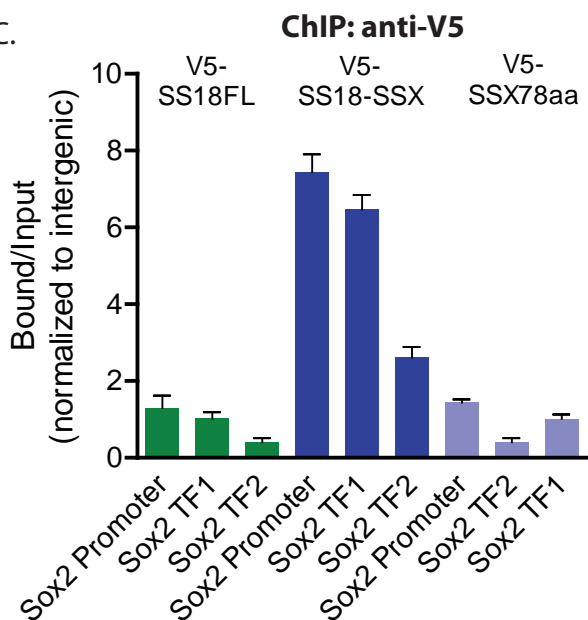

**Figure S5.**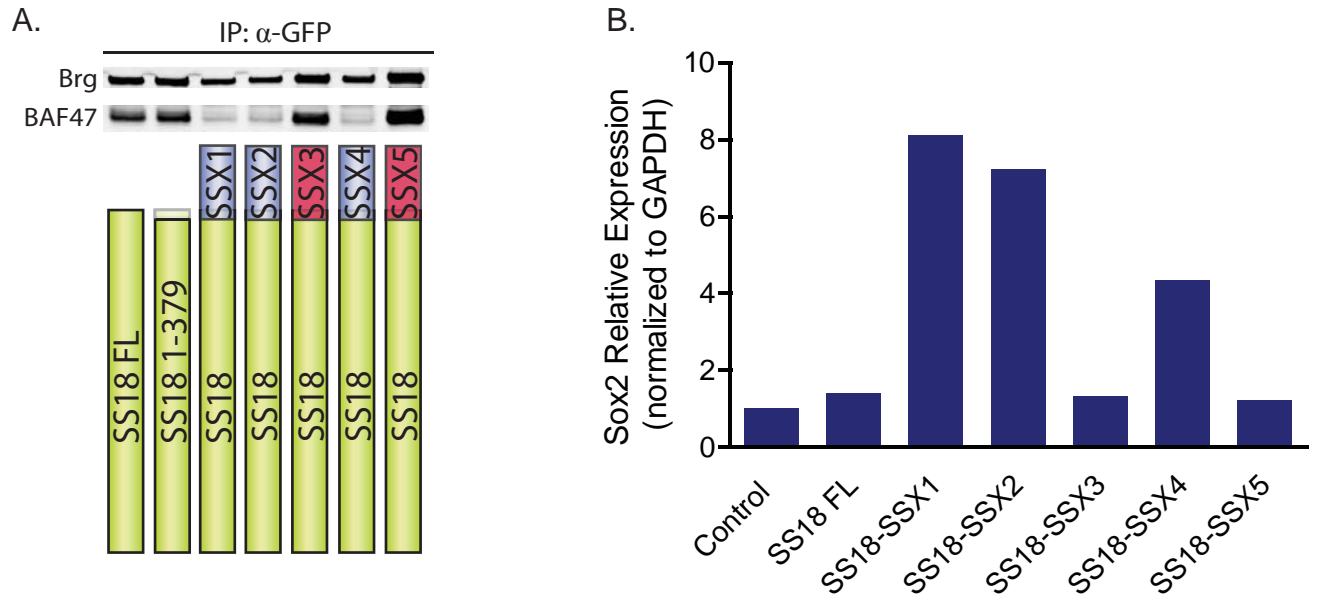





**Table S1. Antibody Specifications**

| <b>Antibody</b> | <b>Clone</b> | <b>Type</b>           | <b>Peptide Region</b>  | <b>Source</b>            | <b>Catalog #</b> |
|-----------------|--------------|-----------------------|------------------------|--------------------------|------------------|
| <b>Brg</b>      | G7           | mouse monoclonal IgG1 | aa209-296; N-terminus  | Santa Cruz Biotechnology | sc-17796         |
| <b>BAF250</b>   | C7           | mouse monoclonal IgG1 |                        | Santa Cruz Biotechnology | sc-373784        |
| <b>BAF170</b>   |              | Rabbit polyclonal     | aa744-857; internal    | generated in-house       | N/A              |
| <b>BAF155</b>   |              | Rabbit polyclonal     | aa924-1004; C-terminus | generated in-house       | N/A              |
| <b>BAF47</b>    | A-5          | mouse monoclonal IgG1 | aa1-300                | Santa Cruz Biotechnology | sc-166165        |
| <b>BAF45d</b>   |              | Rabbit polyclonal     | aa95-201; internal     | generated in-house       | N/A              |
| <b>SS18</b>     | H80          | Rabbit polyclonal     | 1-80 (h)               | Santa Cruz Biotechnology | sc-28698         |
| <b>SSX1</b>     | C-7          | mouse monoclonal IgG1 | 1-188                  | Santa Cruz Biotechnology | sc-166595        |
| <b>Ezh2</b>     |              | Rabbit polyclonal     |                        | Upstate/Millipore        | 07-689           |
| <b>Bmi1</b>     | F6           | mouse monoclonal IgG1 | 1-202                  | Upstate/Millipore        | 05-637           |
| <b>Sox2</b>     |              | rabbit polyclonal     |                        | EMD Millipore            | AB5603           |
| <b>H3K27me3</b> |              | Rabbit polyclonal     |                        | Millipore                | 07-449           |
| <b>GAPDH</b>    | FL335        | Rabbit polyclonal     | FL (h)                 | Santa Cruz Biotechnology | sc-25778         |
| <b>GFP</b>      |              | Rabbit polyclonal     |                        | Invitrogen               | A11122           |

**Table S2. Primer Specifications**

***RT-PCR Primers***

| <b>Gene</b>             | <b>TaqMan Assay ID #</b>     |
|-------------------------|------------------------------|
| <b>Brg1 (smarca4)</b>   | Hs00231324_m1                |
| <b>BAF155 (smarcc1)</b> | hs00268265_m1                |
| <b>BAF170 (smarcc2)</b> | hs00161961_m1                |
| <b>BAF47 (smarcb1)</b>  | hs00268260_m1                |
| <b>SS18</b>             | hs01075909_m1                |
| <b>SOX2</b>             | hs01053049_s1; hs04234836_s1 |
| <b>Pou5f1</b>           | hs00742896_s1                |
| <b>Nanog</b>            | hs02387400_g1                |
| <b>GAPDH</b>            | hs03929097_g1                |
| <b>SS18-SSX ft</b>      | hs03024820_ft                |

***ChIP Primers***

| <b>Gene</b>                | <b>Sequence (5'----3')</b> |
|----------------------------|----------------------------|
| <b>hSOX2-ChIP-Prom F</b>   | GAG AAG GGC GTG AGA GAG TG |
| <b>hSOX2-ChIP-Prom R</b>   | AAA CAG CCA GTG CAG GAG TT |
| <b>hSOX2 TF1a For_ChIP</b> | AAA CAG AGC TTT CCC CCA AT |
| <b>hSOX2 TF1a Rev_ChIP</b> | TTG AGT GTG TTC CCC TCC TC |
| <b>hSOX2 TF2a For_ChIP</b> | TCT CCA GGT CCG TGT TTA CC |
| <b>hSOX2 TF2a Rev_ChIP</b> | CCC GAA GGT TCT CCT TTT TC |

Table S3. shRNA Specifications

| <u>Gene</u>  | <u>Species</u> | <u>Source</u>   | <u>Clone ID#</u>                         | <u>Vector</u> | <u>Accession #'s</u>                                          |
|--------------|----------------|-----------------|------------------------------------------|---------------|---------------------------------------------------------------|
| <b>Brg1</b>  | homo sapiens   | Open Biosystems | V3LHS_317182                             | pGIPZ         | NM_001128844, NM_001128845, NM_001128846, NM_001128847        |
| <b>SS18</b>  | homo sapiens   | Open Biosystems | V3LHS_412280, V3LHS_385463, V3LHS_385460 | pGIPZ         | NM_001007559, NM_005637, AK296949, AK299082, AK304305, X79201 |
| <b>BAF47</b> | homo sapiens   | Open Biosystems | V2LHS_153159, V3LHS_367694, V3LHS_367696 | pGIPZ         | NM_001007468, NM_003073                                       |
| <b>Sox2</b>  | homo sapiens   | Open Biosystems | V2LHS_153337, V3LHS_404430, V3LHS_404432 | pGIPZ         | NM_003106, NM_011443, NM_001109181                            |

| <u>Gene</u>                 | <u>Species</u> | <u>Source</u>             | <u>Clone ID#</u> | <u>Vector</u> | <u>Sequences (5'-- 3')</u>                                                                                         |
|-----------------------------|----------------|---------------------------|------------------|---------------|--------------------------------------------------------------------------------------------------------------------|
| <b>SS18-SSX shRNA-B_For</b> | homo sapiens   | synthesized; oligo anneal | N/A              | pLKO.1        | GGA CGA AAC ACC GGT CCG GCC AAG AGT TCG ATG TTA GTC TCG AGA CTA<br>ACA TCG AAC TCT TGG TTT TTG GAA TTC TCG ACC TCG |
| <b>SS18-SSX shRNA-B_Rev</b> | homo sapiens   | synthesized; oligo anneal | N/A              | pLKO.1        | CGA GGT CGA GAA TTC CAA AAA CCA AGA GTT CGA TGT TAG TCT CGA GAC<br>TAA CAT CGA ACT CTT GGC CGG ACC GGT GTT TCG TCC |
| <b>Control shRNA_For</b>    | homo sapiens   | synthesized; oligo anneal | N/A              | pLKO.1        | GGA CGA AAC ACC GGT CCG GCT TAC GCT GAG TAC TTC GAC TCG AGT CGA<br>AGT ACT CAG CGT AAG TTT TTG GAA TTC TCG ACC TCG |
| <b>Control shRNA_Rev</b>    | homo sapiens   | synthesized; oligo anneal | N/A              | pLKO.1        | CGA GGT CGA GAA TTC CAA AAA CTT ACG CTG AGT ACT TCG ACT CGA GTC<br>GAA GTA CTC AGC GTA AGC CGG ACC GGT GTT TCG TCC |
